# Supplementary material for: Transcription Factor Profiling to Predict Recurrence-Free Survival in Breast Cancer: Development and Validation of a Nomogram to Optimize Clinical Management
Source: Front Genet. 2020 Apr 24;11:333. doi: 10.3389/fgene.2020.00333 (PMC7193038; doi:10.3389/fgene.2020.00333)
Supplement: Supplementary file 3 [file Table_3.XLSX]

## Sheet: Sheet1
Table S3. Hazard ratios and 95% CIs as well as P.values of 702 TFs based on univariate Cox regression analysis.
Characteristics	Hazard.Ratio	CI95	P.value
NR1D1	0.99994	0.99949-1.00039	0.78727
HOXA11	0.9999	0.99723-1.00258	0.94223
HOXA10	0.99971	0.99835-1.00106	0.67077
DDIT3	1.00004	0.99927-1.0008	0.92594
BTG2	0.99991	0.99983-0.99998	0.01403
FOXN1	0.99931	0.99402-1.00462	0.79801
ZNF300	1.00161	0.99993-1.00329	0.06097
TIAL1	0.99951	0.99888-1.00013	0.12325
FUBP3	1.0008	1.00015-1.00145	0.01598
FUBP1	1.00017	0.99984-1.00051	0.31116
BRIP1	1.00029	0.99955-1.00104	0.44389
ENO1	1.00001	1-1.00003	0.13794
EOMES	0.99856	0.99539-1.00174	0.3738
ZBTB7A	1.00004	0.99948-1.00061	0.87872
ILF3	1.00012	1.00003-1.00022	0.01101
ILF2	1.00008	1.00002-1.00013	0.00519
LMX1B	1.00011	0.99991-1.0003	0.29396
GBX2	1.00521	0.98805-1.02266	0.55448
SETBP1	1.00002	0.99954-1.0005	0.93699
POU3F1	0.9995	0.99618-1.00283	0.76778
DMAP1	0.99974	0.9989-1.00058	0.54403
XRCC5	1.00006	0.99996-1.00016	0.22197
XRCC6	1.00003	0.99993-1.00013	0.55807
MEIS2	1.00005	0.99874-1.00137	0.93869
MEIS1	1.00063	0.99929-1.00197	0.35487
HES1	1.00016	0.9999-1.00041	0.2303
BCL6	1.00011	0.99991-1.00032	0.28704
ASXL1	0.99979	0.99932-1.00026	0.38811
HIRA	1.00117	0.99958-1.00276	0.15002
CRABP2	1	0.99999-1.00002	0.78691
ZNF410	1.00089	0.99388-1.00796	0.80377
TFAP4	1.0003	0.99931-1.0013	0.55011
EAF1	1.00016	0.99973-1.00059	0.46991
FOXF1	0.9996	0.98813-1.01121	0.94643
FOXF2	1.00025	0.99693-1.00358	0.88221
GABPB2	1.00083	1.00027-1.00139	0.00354
NOTCH3	1.00001	1-1.00002	0.05803
ZNF383	1.00142	0.9997-1.00315	0.10607
ZNF382	1.00224	1.00139-1.0031	0
EHMT2	1.00015	0.99987-1.00044	0.28943
HTATIP2	1.00011	0.9998-1.00043	0.47675
NFYC	1.00008	0.99968-1.00049	0.68647
NFYB	1.00039	0.99942-1.00136	0.43476
NFYA	1.00007	0.99995-1.00019	0.27245
SKIL	1.0001	1.00002-1.00018	0.00951
THRB	0.99958	0.99907-1.00009	0.10856
THRA	0.99995	0.99973-1.00016	0.62177
CREB5	1.00006	0.99911-1.001	0.90602
CREB1	1.00006	0.99946-1.00067	0.83731
AES	1	0.99994-1.00007	0.89417
LHX2	1.00017	0.99662-1.00375	0.92362
LHX4	1.00101	0.9976-1.00444	0.56221
YBX1	1.00001	0.99998-1.00005	0.40303
NCOA2	1.00009	0.99991-1.00027	0.33452
NCOA3	0.99994	0.99974-1.00015	0.59671
NCOA1	0.99995	0.99961-1.00028	0.7637
NCOA6	1.00004	0.99973-1.00035	0.8047
ERF	1.00025	0.99991-1.00059	0.1472
ERG	0.99955	0.9987-1.00039	0.29552
HAND2	0.9966	0.99066-1.00257	0.26408
HOXA7	0.99666	0.99031-1.00306	0.30597
HOXA5	0.99743	0.99493-0.99995	0.04527
HOXA4	0.99066	0.981-1.0004	0.0602
HOXA1	0.98597	0.9698-1.00241	0.09393
WWP1	0.99997	0.99991-1.00003	0.36588
JARID2	0.99995	0.99948-1.00042	0.83572
NFKBIB	1.00047	0.99984-1.00111	0.14446
NFKBIA	0.99984	0.99965-1.00003	0.10099
NFKBIZ	0.99994	0.99971-1.00018	0.63359
DLX5	1.00087	1.00034-1.00139	0.00136
DLX3	1.00018	0.99856-1.0018	0.8264
FOXN4	1.00114	0.99684-1.00546	0.60384
TP63	0.9997	0.99933-1.00006	0.10619
WWTR1	0.99998	0.9998-1.00016	0.81298
CNBP	0.99991	0.99977-1.00004	0.17463
PIR	1.00046	0.99982-1.0011	0.15912
MLXIPL	1.00001	0.9993-1.00071	0.9886
HNRNPR	1.00012	0.99984-1.00041	0.40193
MAML1	0.99976	0.99915-1.00037	0.43512
TEAD1	0.99999	0.99977-1.00021	0.91312
TEAD4	1.0001	0.99937-1.00082	0.7923
KDM2A	0.99988	0.99969-1.00006	0.18686
FOXM1	1.00008	0.9999-1.00025	0.38312
UBTF	0.9999	0.99963-1.00016	0.44253
RELB	0.99987	0.99932-1.00043	0.65432
RELA	0.99996	0.99958-1.00034	0.85168
HDGF	1.00002	0.99998-1.00006	0.3318
COPS5	1.00023	1.00003-1.00043	0.02258
SSB	1.00002	0.99977-1.00028	0.86638
ZNF335	0.99943	0.99827-1.00058	0.33186
PRDM2	0.99981	0.99935-1.00028	0.43286
EGR2	0.99963	0.99924-1.00002	0.06098
EGR3	0.9997	0.99941-0.99999	0.0425
EGR1	0.99996	0.99993-1	0.02946
ZEB1	0.99987	0.99946-1.00028	0.52795
AATF	0.99983	0.99947-1.00019	0.35796
NFKB1	0.99997	0.99963-1.00032	0.88336
NFKB2	0.99976	0.9994-1.00012	0.19148
HOPX	0.99971	0.99876-1.00065	0.54223
NFATC1	1.00043	0.99995-1.0009	0.07639
NFATC2	0.99985	0.99933-1.00037	0.57822
NRIP1	1.00005	0.99997-1.00013	0.22209
FOS	0.99996	0.99993-1	0.03536
SEC14L2	0.99986	0.99968-1.00004	0.12521
UPF1	1.00006	0.99983-1.00029	0.60767
UPF2	1.00017	0.99986-1.00048	0.28621
ZNF143	1.00038	0.99794-1.00282	0.76247
ZNF148	1.00004	0.99963-1.00045	0.8475
LYL1	0.99985	0.99645-1.00327	0.93195
STAT5B	0.99962	0.99933-0.99992	0.01187
CREB3L1	1.00005	0.99994-1.00016	0.35723
CTCF	0.99968	0.99909-1.00027	0.29313
ZNF423	0.99954	0.9982-1.00088	0.49653
NUPR1	1	0.99992-1.00008	0.99978
SKI	1.00007	0.99981-1.00033	0.57847
PHF8	0.99956	0.99905-1.00007	0.09309
ATRX	0.99997	0.99974-1.00021	0.81746
PREB	1.00023	0.99985-1.00061	0.24475
VHL	1.00008	0.99975-1.0004	0.63931
CEBPZ	1.00052	1.00004-1.001	0.03356
APBB1	0.99894	0.99806-0.99982	0.01801
WDR5	1.00061	1.00021-1.001	0.00254
POU2AF1	0.99947	0.99865-1.00029	0.20523
ZFHX3	1	0.99956-1.00043	0.98702
CBX8	1.00023	0.99908-1.00137	0.69738
CBX7	0.99948	0.99894-1.00003	0.06454
ERCC2	1.00035	0.99958-1.00112	0.37132
CREG1	0.99997	0.9998-1.00014	0.73518
ABL1	1.00005	0.99973-1.00038	0.74899
HNRNPD	0.99998	0.99981-1.00015	0.82361
CTBP1	1.00014	0.99989-1.0004	0.26894
EWSR1	1.00001	0.99983-1.00019	0.91825
DNMT1	1.00006	0.9999-1.00023	0.45211
HOXD9	0.9992	0.99647-1.00193	0.56405
HOXD3	0.99987	0.98103-1.01909	0.98971
KLF7	1.00028	0.99976-1.00081	0.2925
KLF6	0.99998	0.99991-1.00005	0.59444
KLF5	1.00017	1.00002-1.00031	0.0217
KLF4	0.99988	0.99966-1.0001	0.28304
KLF3	1.00003	0.9996-1.00047	0.8829
KLF2	0.99965	0.99919-1.0001	0.1285
KLF1	1.0608	1.03193-1.09048	3e-05
KLF9	0.99991	0.99966-1.00015	0.45017
KLF8	0.99969	0.99858-1.00079	0.57859
REST	1.00035	1.00003-1.00066	0.03148
RARA	0.99997	0.99988-1.00005	0.45074
RARB	1.00019	0.99899-1.0014	0.75224
RARG	1.00024	0.99987-1.00061	0.20886
NRL	0.99926	0.99103-1.00757	0.86168
SALL4	1.00188	0.99813-1.00564	0.32641
HBP1	1.00003	0.99965-1.00042	0.87622
MXI1	0.99985	0.99947-1.00023	0.43208
MEN1	1.00031	0.99981-1.0008	0.22203
AHR	0.99994	0.99977-1.00012	0.52087
UHRF1	1.00055	1.00008-1.00102	0.02216
RB1	0.99987	0.99947-1.00026	0.50656
FHL2	0.99988	0.9997-1.00006	0.18202
PAWR	1.00017	0.99996-1.00039	0.11234
TP53BP1	1.00018	0.99979-1.00057	0.37413
DDB2	0.99916	0.99813-1.0002	0.11405
EHF	1.00004	0.99994-1.00013	0.45819
ARNTL	0.99908	0.99725-1.00092	0.32858
MYBBP1A	1.00006	0.9997-1.00042	0.74678
HDAC1	1.00008	0.99986-1.0003	0.47266
HDAC3	0.99958	0.99873-1.00044	0.33991
HDAC2	1.00008	0.99996-1.0002	0.18374
HDAC5	1.00019	0.99986-1.00053	0.25744
HDAC4	1.00055	0.99942-1.00168	0.33756
HDAC7	0.99961	0.9992-1.00003	0.0666
HDAC9	1.00001	0.99972-1.00029	0.97113
SRCAP	0.99998	0.99983-1.00014	0.80521
CEBPB	1	0.99982-1.00019	0.96243
CEBPA	0.99996	0.99959-1.00032	0.82031
CEBPG	1.00024	1.00001-1.00047	0.04003
CEBPE	1.0043	0.88661-1.13762	0.9462
CEBPD	0.99999	0.99968-1.0003	0.96607
HDAC11	0.99976	0.99941-1.00012	0.19482
HIF3A	0.99989	0.99816-1.00163	0.90545
XPC	0.99919	0.99849-0.9999	0.02548
DENND4A	0.99971	0.99896-1.00047	0.45586
TRERF1	0.99992	0.99938-1.00046	0.76508
SMAD4	1.00027	0.99991-1.00064	0.14519
SMAD7	1.00028	0.99981-1.00076	0.24046
SMAD1	0.9993	0.99832-1.00029	0.1677
SMAD2	1.00027	1.00008-1.00046	0.00567
SMAD3	0.99984	0.99948-1.00019	0.36317
RFX5	1.00002	0.99971-1.00033	0.9005
RFX1	1.00162	1.00008-1.00315	0.0386
RFX2	0.99973	0.99821-1.00126	0.72991
RFX3	1.00018	0.99929-1.00107	0.69293
APC	1.00001	0.99946-1.00057	0.96357
CDC5L	1	0.99972-1.00029	0.9777
BRD7	0.99998	0.9995-1.00045	0.92404
SLA2	0.99627	0.99257-0.99999	0.04949
GTF2F1	0.99979	0.99944-1.00013	0.22727
CUX1	1	0.9998-1.0002	0.98789
TOB1	1	0.99996-1.00005	0.92938
CTNNBIP1	1.00005	0.99967-1.00043	0.78329
CITED2	0.99987	0.99967-1.00006	0.18649
EBF3	0.99945	0.99809-1.00082	0.43022
EBF1	0.99986	0.99948-1.00024	0.48355
FOXH1	1.01202	0.99454-1.0298	0.17896
HLTF	1.00014	0.99991-1.00037	0.23636
RUNX1T1	0.99894	0.99725-1.00064	0.22296
TFAP2A	1.00003	0.9999-1.00015	0.6598
TFAP2C	0.99994	0.99976-1.00013	0.55404
TFAP2B	1	0.99988-1.00012	0.98765
RREB1	1.0003	0.99994-1.00066	0.10271
CDCA7L	1.00002	0.99971-1.00033	0.91778
ZHX2	0.99997	0.99958-1.00036	0.87611
DEK	1.00002	0.99992-1.00011	0.71887
TBPL1	1.0019	1.00061-1.00319	0.00399
FUS	1	0.9999-1.0001	0.97647
ONECUT2	1.00017	0.99931-1.00102	0.70327
HSF1	1.00014	0.99999-1.00028	0.06009
HSF2	1.00011	0.99929-1.00092	0.79681
HSF4	0.99972	0.99837-1.00107	0.68717
RORC	1.00016	0.99974-1.00057	0.46009
RORA	1.00003	0.99934-1.00072	0.9343
TRRAP	1.00006	0.9998-1.00032	0.63722
ZMYND11	1.00013	0.99991-1.00034	0.2523
TAF5	1.00072	0.9974-1.00405	0.67192
TAF1	0.99987	0.99939-1.00035	0.58898
FOSB	0.99997	0.99991-1.00002	0.23201
PDCD11	0.9998	0.99936-1.00024	0.37755
CREM	1.00063	0.9997-1.00157	0.18389
TRIM28	0.99998	0.9999-1.00006	0.58118
TRIM22	0.99971	0.99942-1.00001	0.0554
GTF3A	1.00006	0.99994-1.00019	0.33254
IFI16	0.99994	0.99977-1.0001	0.46377
LRRFIP1	0.99997	0.9998-1.00014	0.71814
POU3F2	0.99915	0.99431-1.004	0.72966
SP100	0.99979	0.99941-1.00017	0.28563
ZNF217	0.99997	0.99987-1.00007	0.5515
NR2E3	1.00081	0.99724-1.00439	0.65772
SMG6	0.99921	0.99825-1.00016	0.10298
SF1	1.00018	0.9999-1.00046	0.21497
SCD5	1.00004	0.99971-1.00037	0.80752
ETS2	1.00004	0.99982-1.00026	0.71428
ETS1	0.99989	0.99973-1.00004	0.14002
CBFA2T3	0.99988	0.99916-1.00059	0.73358
JUN	0.99997	0.9999-1.00003	0.32944
NPAS3	0.997	0.9933-1.00072	0.11404
NPAS2	1.00016	0.99978-1.00054	0.41077
PURA	0.99994	0.99947-1.00041	0.80255
NFAT5	1.00006	0.99979-1.00032	0.68241
GCM1	0.97828	0.95182-1.00548	0.11653
MXD1	1.00017	0.99979-1.00055	0.38589
MED23	1.00016	0.99992-1.00039	0.19838
NONO	1	0.99991-1.0001	0.96314
PARP1	1.00002	0.99994-1.0001	0.68203
TFDP3	1.00066	0.99397-1.00739	0.8478
TFDP1	1	0.99986-1.00013	0.9443
ANKRD1	0.99989	0.99834-1.00145	0.89341
BIN1	0.99949	0.99887-1.00011	0.10731
FOXP2	0.99717	0.99349-1.00087	0.13402
FOXP3	0.99831	0.9963-1.00032	0.09865
FOXP1	1.00004	0.99983-1.00026	0.69967
MYCN	1.00058	0.99975-1.00141	0.17122
ECD	0.99997	0.99927-1.00068	0.94347
ARID3A	1.0007	0.99921-1.0022	0.35719
BTF3	0.99997	0.99991-1.00003	0.35636
FOXO3	0.99999	0.99984-1.00015	0.94902
FOXO1	0.99994	0.99958-1.00031	0.75374
FOXO4	0.99878	0.99783-0.99973	0.01171
PIAS2	1.00057	1.00015-1.001	0.00832
PIAS3	1.00012	0.99977-1.00047	0.519
PIAS1	0.99999	0.99934-1.00065	0.98645
PIAS4	1.00026	0.99952-1.001	0.49487
HMGB2	0.99996	0.99984-1.00009	0.57392
BARD1	1.00094	1.00009-1.0018	0.0304
TTF2	1.00025	0.99969-1.00082	0.37779
POU5F1	0.99614	0.98806-1.00428	0.35156
HOXD13	0.99111	0.97183-1.01076	0.37259
ZNF160	0.99999	0.9992-1.00077	0.97257
GTF2A1	1.00004	0.99954-1.00053	0.88639
BPTF	1.00002	0.99989-1.00015	0.75741
TCF12	1.0001	0.99976-1.00044	0.56984
TCF19	0.9999	0.99954-1.00026	0.58663
CREB3	1.00018	0.99984-1.00052	0.29525
ZFP36	0.99998	0.99993-1.00003	0.3903
TFCP2L1	1.00018	1.00011-1.00025	0
TFCP2	0.99976	0.99899-1.00054	0.55376
OTX1	1.00189	1.00098-1.00281	5e-05
YEATS4	0.99929	0.99806-1.00051	0.25493
HMGA2	1.00116	0.99985-1.00247	0.08344
HMGA1	1.00003	0.99995-1.00011	0.45153
HAX1	1.0001	0.99982-1.00037	0.48182
NELFB	1.0004	1.00012-1.00069	0.00602
NFRKB	0.99997	0.9991-1.00085	0.95349
DBP	1.00051	0.99963-1.0014	0.25548
MED1	0.99997	0.99989-1.00005	0.4495
TCF4	0.99995	0.99976-1.00015	0.63913
TCF7	0.99956	0.99888-1.00024	0.20083
TCF3	1.00018	0.99997-1.00039	0.08695
PCBD1	1.00009	0.99995-1.00022	0.20093
PITX2	0.99908	0.99455-1.00362	0.68989
PITX3	1.00546	0.94555-1.06918	0.86199
PITX1	1.00015	0.99991-1.00038	0.21389
KAT2B	0.99955	0.99869-1.00042	0.31361
MAFK	1.00021	0.99946-1.00096	0.5859
MAFA	1.00411	0.98727-1.02123	0.63474
MAFB	0.99989	0.99955-1.00023	0.52056
MAFF	1.00002	0.99959-1.00045	0.91837
MAFG	1.00018	0.99939-1.00097	0.66156
RBPJ	1.00021	0.99987-1.00054	0.22785
TRAF6	1.00041	0.99892-1.00189	0.59228
POLR1A	1.00051	1.00014-1.00089	0.00695
NR1H2	1.00005	0.99963-1.00048	0.80561
HOXB7	0.99954	0.99836-1.00072	0.44148
HOXB4	0.99881	0.99713-1.0005	0.16698
SPDEF	0.99999	0.99991-1.00007	0.85846
NR2F6	1.0002	0.99998-1.00041	0.07434
NR2F1	1	0.99982-1.00018	0.98265
SNAI2	1.00021	0.99964-1.00078	0.47397
SNAI1	1.00141	0.99993-1.00289	0.06135
EN1	1.00023	1.00008-1.00038	0.00208
HDAC10	1.00012	0.99773-1.00252	0.9197
SUGP1	1.0004	0.99951-1.0013	0.37715
TP53	1.00004	0.99981-1.00026	0.75358
TRIB3	1.00001	0.99968-1.00033	0.97148
EZH2	1.00026	0.99986-1.00067	0.20451
NR4A2	0.99998	0.99964-1.00032	0.89307
NR4A3	0.9998	0.9992-1.0004	0.5072
NR4A1	0.99995	0.99984-1.00006	0.3368
NCOA4	1.00006	1.00001-1.00012	0.01958
HIC1	1.00018	0.99872-1.00165	0.80525
RXRA	1.00012	0.99992-1.00032	0.24784
ZNF267	0.99993	0.99857-1.00129	0.91763
RAD51	1.00136	1.00017-1.00254	0.02497
ZNRD1	1.00054	0.99931-1.00177	0.39219
ETV1	0.99983	0.99895-1.0007	0.70078
ETV3	1.00006	0.9997-1.00043	0.73153
ETV5	0.99974	0.99924-1.00025	0.32007
ETV4	1.00027	0.99975-1.00079	0.31641
ETV7	0.99847	0.99673-1.0002	0.08383
ETV6	1.00002	0.99988-1.00017	0.74521
IKZF1	0.99966	0.99907-1.00026	0.27187
BRPF1	1.00016	0.99946-1.00086	0.65435
SP1	1.0001	0.99984-1.00036	0.44738
SP2	0.99966	0.9987-1.00062	0.48395
SP3	1.00006	0.99977-1.00036	0.66974
SP4	1.00028	0.99885-1.00172	0.69911
HMG20B	1.0001	0.99992-1.00028	0.2757
PBX2	1.00001	0.99944-1.00058	0.97074
PBX1	1	0.99996-1.00005	0.91325
DR1	1.00033	1.00003-1.00063	0.03255
CHD4	1.0001	0.99997-1.00022	0.1321
CHD8	0.99989	0.99958-1.0002	0.47254
ZFP36L1	0.99999	0.99994-1.00004	0.627
LIMD1	1.00012	0.99956-1.00068	0.68166
SPEN	0.99988	0.99959-1.00018	0.44483
DAXX	0.99988	0.99956-1.00021	0.47946
SHOX2	0.99999	0.99746-1.00253	0.99573
HIPK2	1.00001	0.99988-1.00014	0.90688
FOXJ1	0.99967	0.99885-1.0005	0.43601
TCFL5	0.9998	0.99867-1.00093	0.72551
RUVBL1	1.00018	0.99987-1.00049	0.25754
TBC1D22A	1.00015	0.99917-1.00114	0.76099
FOXL2	0.99255	0.96954-1.0161	0.53201
FOXL1	1.00085	0.99845-1.00325	0.48713
BRCA1	1.00027	0.99961-1.00094	0.41765
BRCA2	1.0008	0.99977-1.00184	0.1294
SMURF2	0.99993	0.99949-1.00037	0.7602
PCGF2	0.99996	0.99979-1.00013	0.63084
NR5A2	0.99584	0.9921-0.99958	0.0294
DLX4	1.00208	0.99934-1.00482	0.13735
HMGN1	1.00005	0.99995-1.00015	0.31596
MDM2	0.99998	0.99985-1.00012	0.82814
MDM4	1.00018	1.00001-1.00036	0.03699
ARNTL2	1.00011	0.99989-1.00033	0.33253
GABPA	1.00047	0.99973-1.0012	0.21106
GLIS3	1.00121	1.00026-1.00217	0.01291
SREBF2	1.00003	0.9999-1.00015	0.6872
SREBF1	0.99996	0.99992-1.00001	0.1375
MTA1	1.00019	0.99985-1.00054	0.27407
MTA2	1.00007	0.99984-1.0003	0.53089
MTA3	1.00029	0.99988-1.00071	0.16132
BACH2	0.99724	0.99495-0.99953	0.01816
KCNIP3	1.00079	1.00021-1.00137	0.00787
ELK3	0.99995	0.99959-1.00031	0.7908
ELK1	0.99998	0.99932-1.00064	0.95565
ELK4	1.00026	1.00011-1.00041	0.00057
PER2	0.99982	0.99939-1.00024	0.39868
KAT5	0.99937	0.99812-1.00062	0.32305
PLAG1	1.00037	0.9974-1.00336	0.8063
JDP2	0.99961	0.99876-1.00046	0.36971
ATF4	1.00003	0.99996-1.00011	0.42079
ATF7	1.00014	0.99953-1.00074	0.6557
ATF6	1.00005	0.99981-1.00029	0.67349
ATF1	1.00047	0.99889-1.00206	0.55875
ATF3	0.99989	0.99972-1.00007	0.23778
ATF2	1.0001	0.99941-1.00078	0.77717
LCOR	1.00031	0.99985-1.00078	0.18305
TSC22D1	0.99996	0.99985-1.00008	0.5334
TSC22D3	0.99988	0.99976-0.99999	0.03608
TNFAIP3	0.99995	0.99963-1.00026	0.74092
GFI1	0.99606	0.99025-1.00191	0.18669
HINFP	0.99938	0.9974-1.00135	0.53695
REL	1.0006	1.00011-1.00108	0.01541
ZNF239	1.00005	0.99875-1.00135	0.94282
TAL1	1.00083	0.99782-1.00386	0.58827
FLI1	0.99953	0.99872-1.00034	0.2522
SIRT3	0.99905	0.99811-1	0.05
SIRT2	1.00016	0.99982-1.0005	0.35865
SIRT1	0.99994	0.99926-1.00063	0.87504
CTNNB1	0.99995	0.99989-1.00001	0.09913
GFI1B	1.00249	0.96714-1.03913	0.89205
NR2C2	1.00029	0.99985-1.00073	0.19852
MED15	1.00022	0.99989-1.00056	0.19354
APEX1	0.99997	0.9998-1.00013	0.70647
ESRRA	1.00047	0.99993-1.00102	0.08959
ESRRB	0.99713	0.98838-1.00596	0.52298
BATF	0.99928	0.99823-1.00034	0.18492
HEXIM1	1.00002	0.99971-1.00034	0.88872
PML	1.00001	0.99975-1.00026	0.95069
DRAP1	0.99996	0.99976-1.00015	0.66789
VEZF1	1	0.99974-1.00027	0.97144
MEF2C	0.99963	0.99906-1.0002	0.20014
MEF2B	0.9872	0.95534-1.02012	0.44143
MEF2A	0.99985	0.99952-1.00018	0.36501
MEF2D	0.99993	0.99959-1.00028	0.70776
HIF1A	1.00004	0.99994-1.00013	0.44551
PAX5	0.99925	0.99761-1.00088	0.36518
PAX6	1.00053	0.99963-1.00143	0.25227
PAX1	0.99623	0.98927-1.00324	0.29082
PAX3	1.00798	1.001-1.01502	0.02505
PAX2	0.99876	0.99538-1.00215	0.47214
PAX8	1.00088	0.99883-1.00294	0.40148
RFXANK	1.00013	0.99979-1.00047	0.44951
NCOR1	0.99995	0.99976-1.00013	0.56747
TEF	0.99979	0.99925-1.00034	0.45668
LMO2	0.99884	0.99739-1.00029	0.1173
LMO3	1.00005	0.99961-1.00048	0.83765
LMO4	1.00006	0.99998-1.00014	0.12138
FOXI1	0.9999	0.99948-1.00032	0.63957
UBP1	0.99999	0.99972-1.00026	0.94555
PHB2	0.99996	0.99984-1.00009	0.56473
PKNOX1	1.00148	0.99966-1.00331	0.11149
MCM5	1.00012	0.99984-1.00041	0.39624
MCM2	1.00005	0.99984-1.00027	0.62653
VDR	1.00024	0.99977-1.0007	0.31774
NF1	0.99998	0.99981-1.00015	0.84015
KLF10	0.99992	0.99972-1.00013	0.45347
USF2	1.0001	0.99992-1.00028	0.28774
USF1	1.00002	0.99967-1.00038	0.89266
RBMX	0.99992	0.99962-1.00022	0.59729
TCF7L2	0.99975	0.99918-1.00032	0.38716
CIITA	0.99951	0.99899-1.00002	0.05979
SOX11	1.00012	0.99991-1.00034	0.26107
SOX17	0.99922	0.99704-1.00141	0.48549
HES6	1.00015	0.99948-1.00082	0.65672
MITF	0.99994	0.99901-1.00088	0.90534
SUZ12	1.00004	0.9997-1.00037	0.82426
NFE2	0.99614	0.98885-1.00347	0.30091
FOXA1	0.99999	0.99994-1.00005	0.84465
FOXA3	0.9999	0.99698-1.00283	0.9472
NKX3_1	1.00001	0.99971-1.00031	0.94927
DACH1	1.00016	0.99992-1.0004	0.19429
TSG101	0.99992	0.99952-1.00031	0.6814
ZEB2	1	0.99973-1.00027	0.97922
SNW1	0.99978	0.99919-1.00036	0.45667
TRIM16	1.00044	0.99946-1.00142	0.3815
URI1	1	0.99987-1.00013	0.95384
SMARCB1	1.00015	0.99987-1.00043	0.28316
PPARGC1A	0.99943	0.99792-1.00093	0.45447
JUNB	0.99999	0.9999-1.00007	0.78133
JUND	1	0.9999-1.0001	0.96919
PPARG	0.99996	0.99965-1.00026	0.77473
PPARD	0.99992	0.99945-1.0004	0.75299
PPARA	1.00025	0.99965-1.00085	0.41326
DDB1	0.99999	0.99989-1.00008	0.78792
DEDD	1.00021	0.99978-1.00063	0.33746
IKBKB	1.00005	0.99991-1.00018	0.49584
PLAGL2	1.00018	0.99937-1.00099	0.66255
PLAGL1	1.0006	1.00014-1.00106	0.01078
EPAS1	0.99999	0.99993-1.00005	0.72872
E2F7	1.00139	1.00004-1.00274	0.04378
ZNF202	0.99988	0.99766-1.00211	0.91885
ELL	1.00004	0.99857-1.00151	0.95747
NPM1	0.99999	0.99993-1.00004	0.60148
NAB1	1.00006	0.99959-1.00053	0.80079
NAB2	0.99961	0.99896-1.00026	0.23804
TP73	1.00046	0.99815-1.00277	0.69785
E4F1	1.00002	0.9995-1.00053	0.95327
ESRRG	0.99993	0.99934-1.00051	0.80724
ZBTB2	1.00027	0.99976-1.00077	0.3002
ZBTB5	1.00078	1.00007-1.00149	0.03046
TRPS1	0.99999	0.99996-1.00001	0.35436
GRHL1	1.00016	0.99997-1.00035	0.10857
NR3C2	0.99959	0.99855-1.00063	0.43944
NR3C1	0.99981	0.99957-1.00005	0.12903
NFE2L2	0.99997	0.9997-1.00025	0.8602
NFE2L1	1.00003	0.99999-1.00008	0.13419
SCAND1	1.00001	0.99974-1.00028	0.94542
MLLT10	1.00059	1.00021-1.00097	0.00257
SOX9	1.00007	0.99997-1.00017	0.20126
SOX2	0.99945	0.99773-1.00117	0.53245
SOX4	1.00009	1.00002-1.00017	0.01199
SOX5	0.99949	0.99767-1.00132	0.58627
CRTC1	1.00014	0.99895-1.00133	0.81624
BTAF1	0.99989	0.99939-1.00038	0.65451
MSC	1.0003	0.99859-1.00201	0.73266
NR1H3	0.99909	0.99825-0.99993	0.03378
SLC2A4RG	0.99998	0.99981-1.00014	0.80095
RFXAP	0.99615	0.99093-1.0014	0.1504
ELF1	1.00003	0.99976-1.0003	0.84033
ELF3	0.99999	0.99989-1.00009	0.83386
ELF2	1.00029	0.99939-1.00119	0.52829
ELF4	0.99995	0.99941-1.00049	0.86492
AIP	0.99967	0.99919-1.00015	0.1764
RNF14	1.00012	0.99973-1.00051	0.54268
FOXQ1	0.99839	0.99358-1.00322	0.51208
HLX	1.00025	0.998-1.00252	0.8257
HLF	0.99944	0.99877-1.00012	0.10674
SIX1	0.99997	0.9997-1.00025	0.84666
KHDRBS1	1.00022	0.99997-1.00048	0.09042
MYBL1	1.0002	0.99992-1.00047	0.15819
MYBL2	1	0.99987-1.00013	0.99398
SRSF1	1.00022	1.00002-1.00042	0.03244
SRF	0.99989	0.99958-1.00021	0.50738
EIF2AK2	1.00006	0.9999-1.00023	0.4439
HNF4G	0.99934	0.99566-1.00303	0.72531
MLX	0.9998	0.9991-1.0005	0.57838
DEAF1	0.99949	0.9988-1.00018	0.14731
MECP2	0.99993	0.99946-1.0004	0.76003
GZF1	0.99976	0.99865-1.00086	0.66577
ATM	1.00007	0.99979-1.00036	0.6081
TBX21	0.99246	0.98425-1.00073	0.07394
KLF13	1.00009	0.99985-1.00034	0.46094
KLF12	1.00056	0.99989-1.00124	0.10358
KLF11	1.00027	0.9997-1.00084	0.35705
KLF16	1.00052	0.99965-1.00139	0.23792
KLF15	0.99965	0.99815-1.00115	0.65046
KLF14	1.00324	0.99434-1.01222	0.47714
HHEX	0.99989	0.99844-1.00133	0.878
DNMT3A	1.00047	1.00014-1.00081	0.00566
ZNF175	0.99912	0.9972-1.00104	0.36912
NFIL3	1.00005	0.99956-1.00053	0.84897
PTTG1	1.0003	0.99997-1.00064	0.07822
E2F6	1.00141	1.00056-1.00226	0.00119
E2F5	1.00059	0.99994-1.00123	0.07502
E2F4	0.99964	0.999-1.00028	0.27299
E2F3	1.0003	0.99994-1.00066	0.09944
E2F2	1.00032	0.99996-1.00068	0.07822
E2F1	1.00017	0.99969-1.00066	0.47837
E2F8	1.00052	0.99935-1.00168	0.38394
TBP	1.00159	0.99938-1.00381	0.15893
RBBP7	0.99995	0.99985-1.00005	0.30342
FOXD3	0.99827	0.98944-1.00718	0.70318
MLLT3	1.00002	0.99967-1.00038	0.89639
CDX1	0.98957	0.96256-1.01734	0.45788
TLE3	0.99994	0.99977-1.00011	0.49609
TFPT	1.0001	0.99945-1.00076	0.75279
MBD1	0.99995	0.99921-1.0007	0.90105
MBD2	1.00008	0.99976-1.00039	0.63376
IRF3	1.00001	0.99963-1.00039	0.96977
IRF1	0.99968	0.9994-0.99996	0.0238
IRF7	0.99973	0.99938-1.00009	0.13973
IRF6	1.00003	0.99994-1.00012	0.50018
IRF4	0.99997	0.99916-1.00078	0.94175
IRF9	0.99888	0.99652-1.00124	0.3512
IRF8	0.99996	0.99948-1.00045	0.88225
ZBTB17	0.99967	0.99847-1.00088	0.59606
ZBTB16	0.99947	0.99841-1.00054	0.3315
ZBTB14	1.00031	0.99835-1.00227	0.75687
NRF1	0.99981	0.99683-1.0028	0.90007
SERTAD1	0.99986	0.9989-1.00082	0.77305
FOSL1	1.00032	0.99951-1.00113	0.43743
FOSL2	1.00002	0.9999-1.00014	0.77703
MAX	1.00005	0.9996-1.0005	0.82591
MAZ	1.00011	0.99981-1.00042	0.46783
MAF	0.99975	0.99928-1.00022	0.29446
MAL	0.99792	0.99289-1.00297	0.41877
IRF2	0.99886	0.99792-0.99981	0.01818
IRF5	0.99954	0.99817-1.00091	0.50812
TBL1X	0.99982	0.99944-1.00019	0.33872
SMARCA1	0.99998	0.99976-1.00021	0.88148
SMARCA4	1.00014	1.00004-1.00023	0.00414
PA2G4	1.00008	0.99995-1.00022	0.23838
NR1I3	1.00758	1.00022-1.01499	0.04339
NR1I2	1.01757	1.00432-1.031	0.00919
HOXC9	1.00111	0.99969-1.00253	0.12547
HOXC8	1.0002	0.99735-1.00305	0.8923
HOXC6	1.00044	0.9994-1.00148	0.40958
MSX1	1.00106	0.99912-1.00301	0.28542
MSX2	0.99972	0.9989-1.00054	0.50661
SIN3A	1.00005	0.99976-1.00035	0.73699
ZIC2	0.99942	0.99684-1.00201	0.65897
ZIC1	1.00043	0.99931-1.00155	0.45347
ING4	0.99989	0.9992-1.00058	0.74869
ING1	1.00004	0.99973-1.00035	0.81168
ING2	1.00059	0.99886-1.00231	0.50631
SNIP1	1.00004	0.99821-1.00187	0.96547
NCOR2	1.00013	0.99999-1.00026	0.06079
SUPT3H	0.9999	0.99733-1.00246	0.93619
RB1CC1	1.00013	0.99995-1.0003	0.16423
TFEB	1.00035	0.9997-1.001	0.28803
LEF1	1.00004	0.99969-1.00038	0.83192
PGR	0.99996	0.9999-1.00002	0.23423
BMI1	1.00006	0.99994-1.00019	0.30299
CBFB	1.00011	0.99967-1.00056	0.61558
ZNF24	1.00005	0.99995-1.00015	0.3569
ARNT	1.00026	0.99988-1.00063	0.17804
RUNX2	0.99988	0.99923-1.00054	0.72831
RUNX3	1.00002	0.99962-1.00041	0.92946
ESR2	1.00235	0.9953-1.00945	0.51489
ESR1	0.99998	0.99996-1.00001	0.2072
TBX2	1.00083	1.00015-1.00151	0.01698
TBX3	0.99996	0.99985-1.00008	0.51785
TBX5	1.00104	0.99787-1.00421	0.52134
BDP1	1	0.99965-1.00035	0.99864
RFWD2	1.00038	0.99996-1.00079	0.07452
AR	0.99996	0.99989-1.00004	0.33979
CREB3L4	1	0.99988-1.00012	0.99317
CNOT8	1	0.9996-1.00041	0.98156
CNOT7	0.99998	0.99971-1.00025	0.86508
EAPP	0.99989	0.9993-1.00048	0.71658
EGF	0.99979	0.99916-1.00042	0.51329
NELFCD	0.99992	0.99974-1.0001	0.38445
KDM4B	0.99995	0.99983-1.00007	0.37059
WT1	0.99985	0.99888-1.00082	0.76733
GSC	0.99811	0.99328-1.00297	0.44479
NFATC3	0.99961	0.99868-1.00053	0.40216
ID4	1.00001	0.99988-1.00014	0.87312
ID2	0.99991	0.9996-1.00023	0.59091
ID3	1.00029	0.99999-1.0006	0.05874
ID1	1.00003	0.9995-1.00056	0.90643
GLI2	0.99868	0.99521-1.00215	0.45566
GLI3	0.99997	0.99978-1.00016	0.78673
GLI1	0.98882	0.97886-0.99888	0.02953
BARX2	1.00027	1.00007-1.00046	0.00639
HIVEP2	1.00007	0.9996-1.00055	0.76726
MYOCD	0.99761	0.99051-1.00475	0.51076
SFPQ	1.00012	0.99998-1.00026	0.08776
FOXK2	1.00005	0.99979-1.00032	0.69142
HCFC1	1.0001	0.99977-1.00044	0.54847
ZNF350	0.99987	0.999-1.00074	0.77262
TWIST1	0.99971	0.99867-1.00075	0.58031
TWIST2	0.99942	0.99759-1.00126	0.53915
HNF1A	1.01339	0.99455-1.03259	0.16462
POU2F2	0.99934	0.99798-1.0007	0.34034
POU2F1	1.00062	1.00007-1.00117	0.02769
PRDM1	0.99999	0.99932-1.00067	0.98819
MYC	1.00005	0.99995-1.00014	0.3602
MYB	0.99993	0.99977-1.00009	0.40391
GATA6	1.00023	0.99933-1.00113	0.62344
GATA2	1.00016	0.9996-1.00073	0.57443
GATA3	0.99999	0.99996-1.00001	0.34623
GATA1	0.98992	0.92247-1.0623	0.77844
CLOCK	1.00061	1.00029-1.00093	0.00022
KAT6A	1.00002	0.99994-1.00011	0.59505
BHLHE41	1.00001	0.99982-1.0002	0.92682
KDM4C	1.00104	0.99956-1.00253	0.16734
STAT5A	0.99978	0.99949-1.00007	0.13873
ZNF444	0.99996	0.99944-1.00049	0.89274
L3MBTL1	1.00001	0.99816-1.00186	0.99296
FOXC2	1.00029	0.9991-1.00149	0.62981
FOXC1	1.00014	1.00002-1.00026	0.01881
MZF1	0.99985	0.99895-1.00074	0.73806
HR	1.00011	0.99984-1.00038	0.43472
PROX1	0.99853	0.99648-1.00058	0.16074
GTF2B	1.00046	0.99916-1.00176	0.49087
GTF2I	1.00016	0.99983-1.00049	0.35396
CREBBP	0.99992	0.99969-1.00015	0.49456
HEYL	1.00013	0.99927-1.001	0.76286
RBL1	1.00065	1.00012-1.00118	0.01595
RBL2	0.99995	0.99969-1.00021	0.71344
HEY2	1.00006	0.99947-1.00064	0.84885
HEY1	1.0004	0.99982-1.00098	0.17762
MTF1	1.00071	0.99983-1.00158	0.11229
ZNF224	0.99886	0.99632-1.00141	0.38091
HOXC11	1.00023	0.99923-1.00124	0.65209
HOXC10	1.00004	0.99979-1.00029	0.73342
HOXC13	1.00039	0.99953-1.00126	0.372
SPI1	0.99947	0.99875-1.0002	0.15425
SPIB	0.9996	0.99893-1.00028	0.24722
SIM2	1.00013	0.99948-1.00078	0.6939
LDB1	1	0.99949-1.00051	0.99379
SATB2	0.99955	0.99823-1.00088	0.50553
SATB1	1.00002	0.99979-1.00024	0.8893
PHF10	1.00012	0.99976-1.00047	0.51808
BCL11A	1.00033	0.9999-1.00075	0.13595
POU2F3	0.99953	0.99782-1.00125	0.59388
ARID1B	1.00029	0.99994-1.00063	0.10446
ARID1A	0.99996	0.99973-1.0002	0.77035
MKL1	0.9996	0.99895-1.00025	0.22877
NHLH2	1.00207	0.99885-1.0053	0.20873
SND1	1.00004	0.99993-1.00016	0.45532
TGIF1	1.00021	0.99988-1.00054	0.20937
STAT6	0.9999	0.99969-1.00012	0.37241
STAT4	0.99765	0.99458-1.00073	0.13437
STAT3	0.99999	0.99991-1.00008	0.89053
STAT2	0.99992	0.99969-1.00015	0.50543
STAT1	0.99999	0.99996-1.00002	0.54498
ARX	1.00033	0.99653-1.00415	0.86399
ZNF76	0.99995	0.99905-1.00085	0.91675
NFIC	1.00001	0.99989-1.00012	0.88433
NFIB	1.00001	0.99994-1.00008	0.75
NFIA	0.99997	0.99979-1.00015	0.73223
NFIX	1.00009	1.00002-1.00016	0.00781
